# Supplementary material
Source: bioRxiv or medRxiv preprint supplement (https://medrxiv.org/content/medrxiv/early/2022/03/18/2022.03.16.22272463/DC1/embed/media-1.pdf)
Supplement: Supplementary file [file media-1.pdf]

**S1. Bivariate logistic regression of expressed hesitancy to the COVID-19 vaccine**

|                                                   | <b>OR</b> | <b>p-value</b> | <b>95% CI</b> |
|---------------------------------------------------|-----------|----------------|---------------|
| Age – older                                       | 1.151     | .284           | 0.890 – 1.489 |
| Female                                            | 1.417     | .017           | 1.064 – 1.888 |
| Urban community                                   | 1.539     | .000           | 1.194 – 1.986 |
| Married or In a relationship                      | 1.01      | .934           | 0.787 – 1.297 |
| Higher education (undergrad or postgrad)          | 1.705     | .000           | 1.313 – 2.214 |
| Being unemployed                                  | 0.908     | .441           | 0.711 – 1.160 |
| Christian beliefs                                 | 2.175     | .000           | 1.485 – 3.186 |
| Political beliefs                                 |           |                |               |
| National Democratic Congress (NDC, opposition)    | 1.260     | .238           | 0.859 – 1.847 |
| New Patriotic Party (NPP, party in power)         | 0.514     | .000           | 0.380 – 0.693 |
| Other political party                             | 0.636     | .089           | 0.377 – 1.072 |
| Personally know somebody who received vaccine (Y) | 0.827     | .158           | 0.635 – 1.076 |
| Beliefs in misinformation                         | 1.286     | .042           | 1.009 – 1.638 |
| Uncertainty about misinformation beliefs          | 2.003     | .000           | 1.568 – 2.556 |
| Channels of COVID-19 information                  |           |                |               |
| Facebook                                          | 0.847     | .216           | 0.650 – 1.102 |
| Whatsapp                                          | 0.957     | .749           | 0.734 – 1.249 |
| Twitter                                           | 0.919     | .640           | 0.644 – 1.311 |
| Mass media (e.g., radio, newspapers, TV)          | 1.257     | .112           | 0.948 – 1.667 |
| Ghana Health Service or health workers            | 0.714     | .007           | 0.560 – 0.910 |
| Government officials                              | 0.697     | .015           | 0.522 – 0.931 |
| Family members or friends                         | 0.849     | .214           | 0.655 – 1.100 |
| Internet (e.g., Google, news websites, blogs)     | 1.328     | .021           | 1.043 – 1.692 |
